# Supplementary material
Source: MDPI journal article supplement (https://www.mdpi.com/2297-8739/10/9/517)
Supplement: s1 [file s1]

## Supporting Information

# Analytical Method and Stability Study for Oral Suspension of Idebenone in Syrspend

Emanuele Porru <sup>1</sup>, Filomena Piro <sup>2</sup>, Rossana Comito <sup>1</sup>, Anastasiia Mosendz <sup>3</sup>, Elirosa Minniti <sup>2</sup>, Matteo Conti <sup>4</sup>, Alessandra Stancari <sup>2</sup> and Francesco Saverio Violante <sup>1,\*</sup>

<sup>1</sup> Occupational Medicine Unit, Department of Medical and Surgical Sciences, Alma Mater Studiorum—University of Bologna, 40138 Bologna, Italy; emanuele.porru2@unibo.it (E.P.); rossana.comito2@unibo.it (R.C.)

<sup>2</sup> Clinical Pharmacy Production and Research, IRCCS Azienda Ospedaliero—Universitaria di Bologna, 40138 Bologna, Italy; filomena.piro@aosp.bo.it (F.P.); elirosa.minniti@aosp.bo.it (E.M.); alessandra.stancari@aosp.bo.it (A.S.)

<sup>3</sup> Department of Analytical Chemistry, Taras Shevchenko National University of Kyiv, 01033 Kiev, Ukraine; anastasiia.mosendz@studio.unibo.it

<sup>4</sup> Local Unit of Imola, Department of Public Health, Health Service of the Emilia—Romagna Region, 40026 Imola, Italy; matteo.conti@ausl.imola.bo.it

\* Correspondence: francesco.violante@unibo.it; Tel.: +39-051-2142611; Fax: +39-051-2142609

**Table S1. Idebenone mean concentration value expressed as relative percent of recovery after forced degradation.**

| Stress condition | Duration | IDB concentration (%) |
|------------------|----------|-----------------------|
| Acid hydrolysis  | 10 days  | 100%                  |
| Base hydrolysis  | 24 hours | 75.2%                 |
| Oxidation        | 7 days   | 90.3%                 |
| Thermal (50°C)   | 10 days  | 100 %                 |
| Photolytic       | 11 days  | 100 %                 |

**Figure S1. Calibration curve in Mobile phase (A) and in matrix (B)**

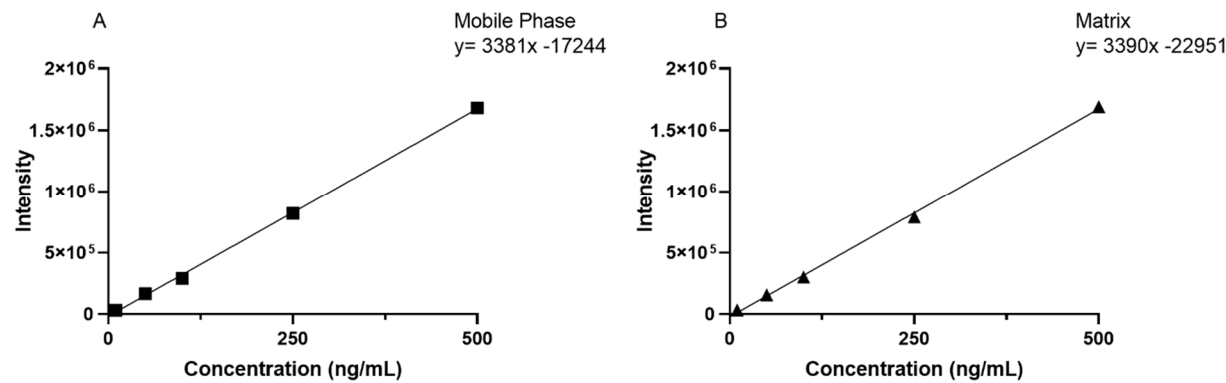

**Table S2. Accuracy (bias %) and precision (CV%) intra- (n=3) and inter-day (n=9) repeatability at three concentrations (low, medium, high).**

| Compound | Intra-day (n=3) |     |          |     |        |     | Inter-day (n=9) |     |          |     |        |     |
|----------|-----------------|-----|----------|-----|--------|-----|-----------------|-----|----------|-----|--------|-----|
|          | QClow           |     | QCmedium |     | QChigh |     | QClow           |     | QCmedium |     | QChigh |     |
|          | Bias            | CV  | Bias     | CV  | Bias   | CV  | Bias            | CV  | Bias     | CV  | Bias   | CV  |
|          | %               | %   | %        | %   | %      | %   | %               | %   | %        | %   | %      | %   |
| IDB      | 5,2             | 4,3 | 4,5      | 2,3 | 4,5    | 1,7 | 5,2             | 2,8 | 4,2      | 3,6 | 4,8    | 3,8 |
